# Supplementary material
Source: PubMed Central journal article supplement (PMC9487518)
Supplement: aac.00802-22-s0003.pdf [file aac.00802-22-s0003.pdf]

sFig1.  
*emm101* ST182  
 PBP2x14 (I502V,  
 A397V)

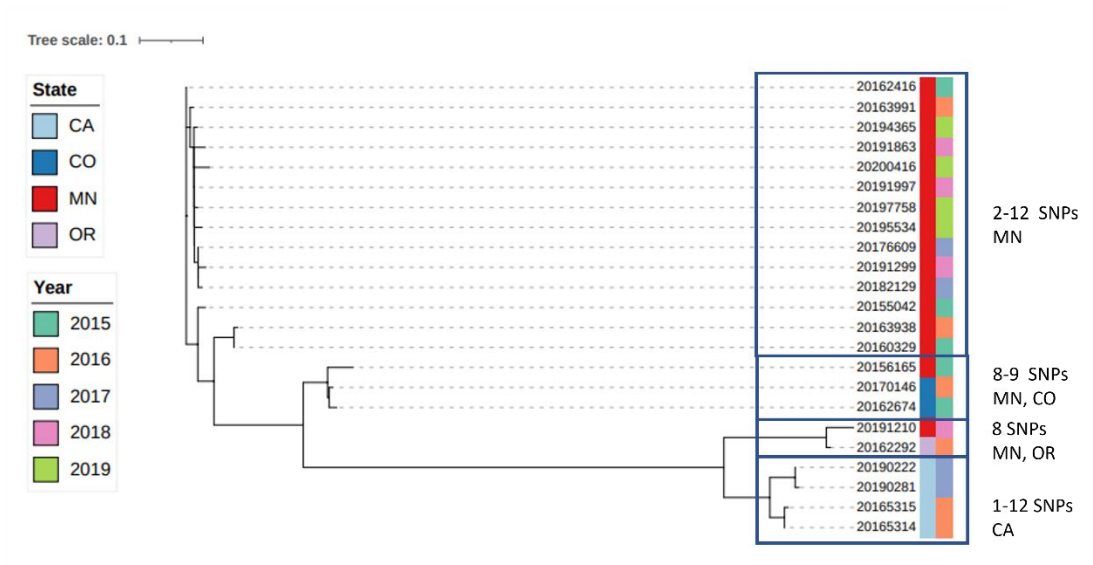

**sFigure 1.** Core Phylogeny of *emm101*/ST182 lineage sharing type PBP2x14 (Ile502Val, Ala397Val) recovered in 5 states during 2015-2019. Figure represents a mixture of temporally related and unrelated strains, suggestive of potentially long-standing origin of these mutants. The inside color band codes for state and outside color band for the isolation year.

sFig. 2  
*emm1* ST28  
 PBP2x18

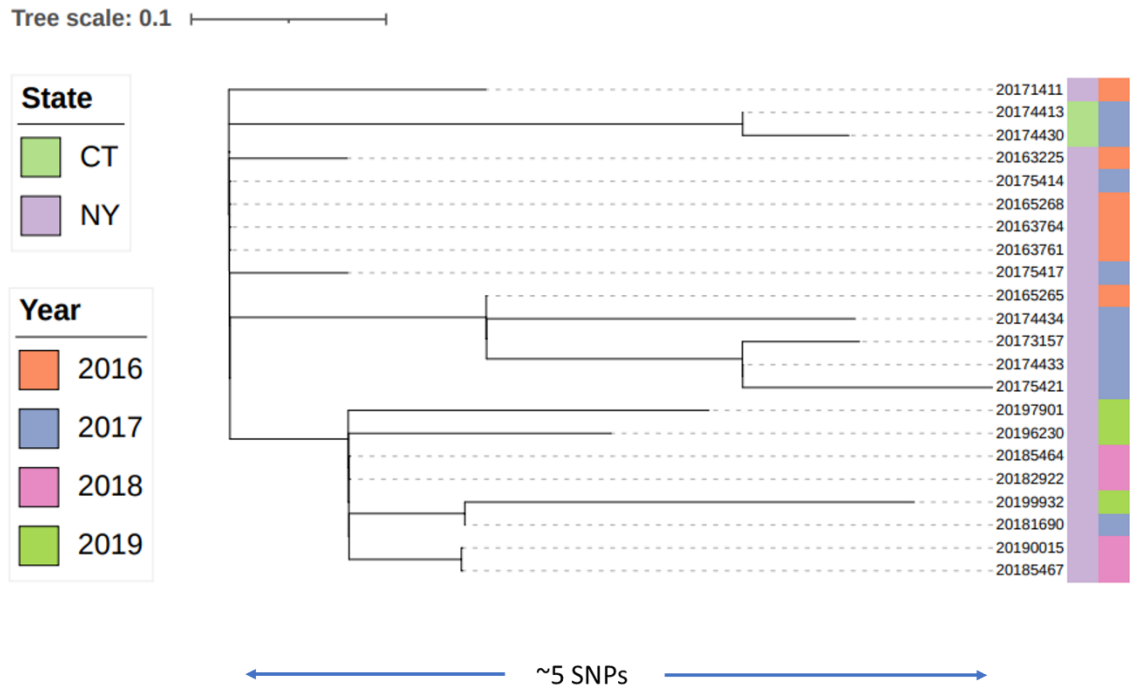

**sFigure 2.** Core phylogeny of the 22 nearly genetically indistinguishable *emm1* isolates sharing PBP2x18 (Ala397Val), with an average of 5 SNPs over the entire shared core genome. Except for 2 isolates from CT, all were recovered in NY during 2016-2019 which was also consistent with recent transmission. The inside color band codes for state and outside color band for the isolation year.

sFig. 3  
*emm1* ST28  
 PBP2x47

Tree scale: 0.1

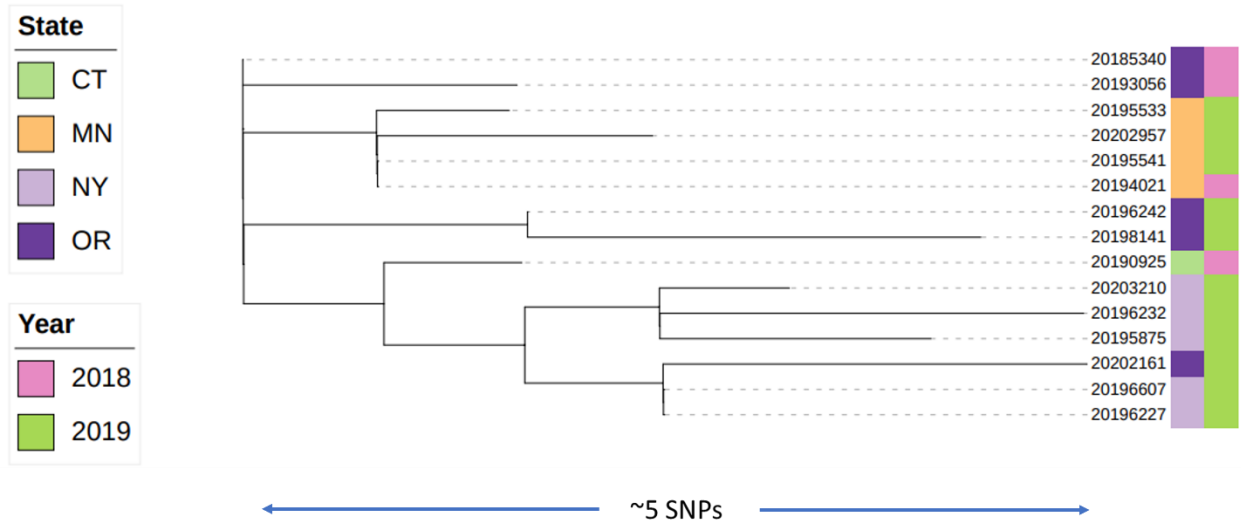

**sFigure 3.** Core phylogeny of PBP2x47 (K410E) variants detected in 23 isolates primarily among *emm1*/ST28 lineage. These 23 isolates shared nearly identical genomes (average SNP distance = 5) and were found in four states (NY, CT, MN, and OR) during 2018-2019. The inside color band codes for state and outside color band for the isolation year.

sFig 4.  
*emm89* ST101  
 PBP2x16

Tree scale: 0.1

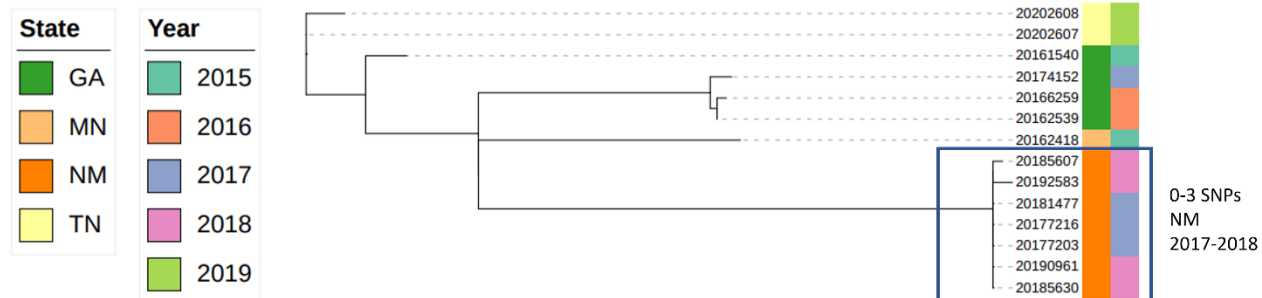

**sFigure 4.** Core phylogeny of PBP2x16 (Ser562Thr, Pro601Leu) was associated with increased MICs to four of the five beta-lactams tested and was found only in *emm89*/ST101 strains recovered from multiple states during 2015-2019. Seven of these isolates were recovered from NM in 2017-2018 and shared near identity (differed by 0 to 3 SNPs). The remaining eight isolates from GA, TN, MN, and OR were more distantly related.

sFig. 5  
*emm89* ST101

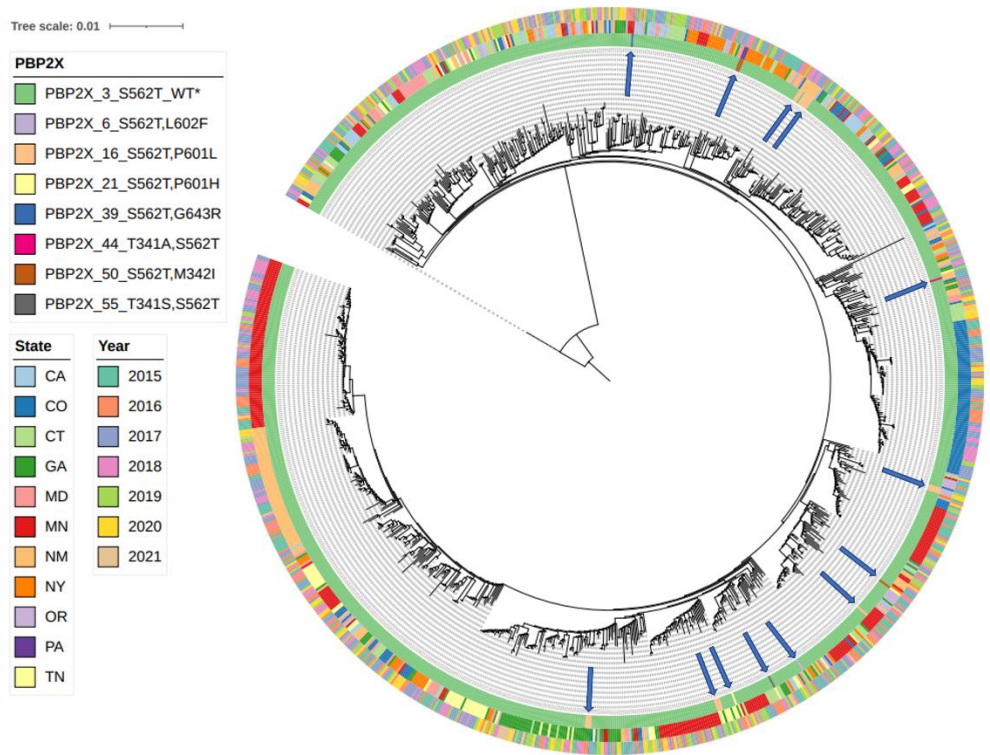

**sFigure 5.** Core phylogeny of *emm89*/ST101 lineage, average distance 41 SNPs (all 1014 recovered 2015-2021 are characterized). In contrast to core phylogeny of *emm1*/ST28 lineage, PBP2x types of this lineage are represented by fewer isolates spread among PBP2x3 type (that has beta-lactam susceptibility of wild type\*), potentially indicative of more recent emergence.

sFig 6.  
*emm73* ST331

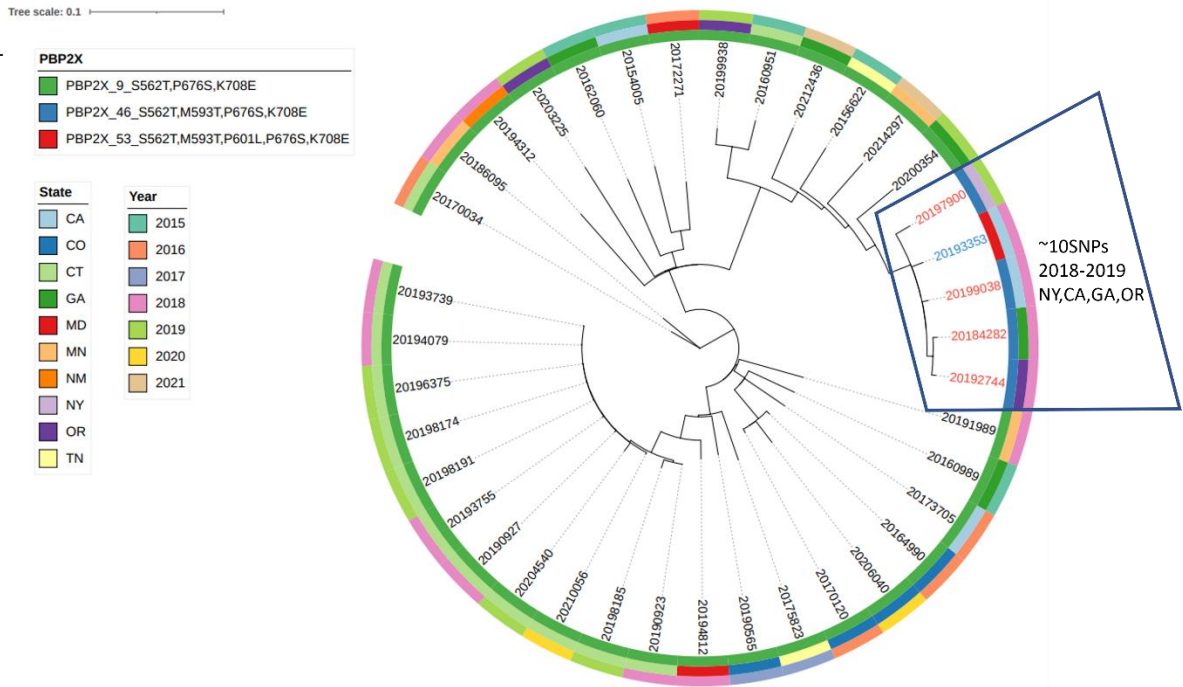

**sFigure 6.** Core phylogeny of *emm73* ST331 lineage depicting the single PBP2x53 variant likely to have arisen from a point mutation of the *pbp2x46* allele within an *emm73* precursor strain. Legends for this and all other phylogenies depicted employ same scheme as follows: innermost circle is color coded for PBP2x substitution, the second circle from inside is depicting state, and the third circle from inside is depicting year of isolation.

**sTable 1.** Compiled dataset of the combined PBP2x transpeptidase types/flanking substitutions with genomic accession numbers and selected bioinformatics pipeline information.

Abbreviations and explanations for selected columns. For more information regarding our WGS-based characterization of GAS please see reference [21]:

**PBP2x Type:** Penicillin binding protein 2X transpeptidase type for detection of the first-step mutations leading to  $\beta$ -lactam nonsusceptibility.

**PBP2x Substitution:** Based upon 1167 bp query (bases 808-1974) corresponding to amino acids 270 – 688.

PBP2x Flanking Substitution: All substitutions outside of our query region (residues 270 – 688) for potential reduced susceptibility to  $\beta$ -lactam antibiotics.

*emm* Type: *emm* subtype from WGS, from *emm* subtype database at [ftp://ftp.cdc.gov/pub/infectious\\_diseases/biotech/tsemm/](ftp://ftp.cdc.gov/pub/infectious_diseases/biotech/tsemm/)

ST: Multilocus sequence type, from database at <https://pubmlst.org/spyogenes/>

T Type: Important virulence factor that function in epithelial adhesion. 60 bp sequencing query for major pilus protein T antigen gene (*tee*).

Group A: Presence/absence of Group A antigen.

EMM Family: Presence/absence of *emm* family genes *mrp* and *enn*.

Other surface proteins: Presence or absence of additional surface protein genes. SOF - Serum opacity factor is an important hypervariable virulence factor expressed by a large percentage of GAS strains; FBAA, PRTF2, SFB1 - Fibronectin binding proteins; R28 - Adhesin.

Capsule: Hyaluronate capsule, presence/absence of *hasA* hyaluronic acid synthetase operon determinant.

SDA1: Virulence associated DNase.

SIC: Streptococcal inhibitor of complement.

ROCA: RocA null mutations.

PNGA3: Pnga 3 - Clade 3 up-regulated promoter of the *nga* operon.

NADase D330G: NADase D330G substitution associated with increased NADase activity.

Exotoxins: Exotoxin gene profile (*speA* to *speC*, *speG* to *speM*, *ssa*, *smeZ*).

ERY, CLI: Macrolide and/or clindamycin resistance determinants (*ermB*, *ermT*, *ermTR*).

TET: Presence/absence of *tet* genes, conferring resistance to tetracyclines. *tet* refers to determinant other than *tetM* and *tetO*.

ParC, GyrA: Certain substitutions within ParC and/or GyrA confer resistance to fluoroquinolones.

Other Resistance: Other resistance features that include accessory resistance features not already listed (cat, Agly, Ant6-Ia, Aph3-III, Sat4A). The aph3 and sat4a determinants encode resistance to certain aminoglycosides. The cat gene confers chloramphenicol-resistance.

Contig No: Total number of DNA sequence segments that comprise the genomic data.

N50: Average length (base pairs) of contig.

Longest contig: Longest contig described as number of base pairs.

Total bases: Sum of the base pairs comprising the genomic data.

Neg: Stands for negative and denotes absence of the genomic determinant.

**sTable 2.** PBP2x types and their corresponding sequences based upon 1167 bp query (bases 808-1974) corresponding to amino acids 270 – 688.
